# Supplementary material
Source: bioRxiv or medRxiv preprint supplement (https://www.biorxiv.org/highwire/filestream/80144/field_highwire_adjunct_files/0/261560-1.pdf)
Supplement: Supplementary file [file 261560-1.pdf]

A

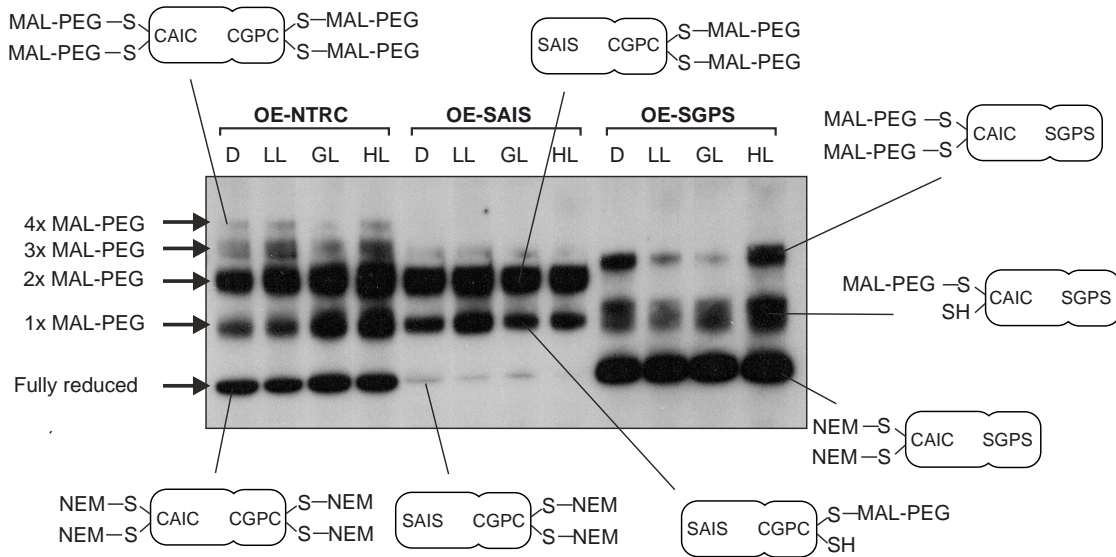

B

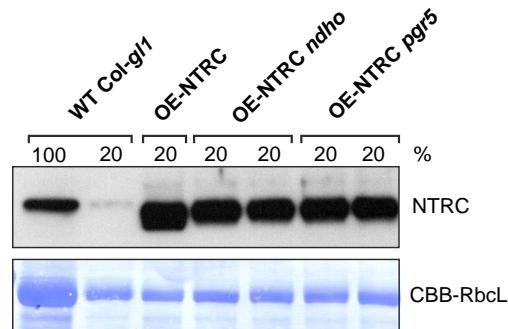

**Supplemental Figure 1.** Redox state and expression of NTRC in transgenic lines.

**(A)** Redox-state pattern of NTRC in leaves overexpressing NTRC. Total leaf proteins were extracted from leaves overexpressing NTRC (OE-NTRC) and from lines overexpressing mutated forms of NTRC where the redox-active cysteines in either the reductase domain (OE-SAIS) or in the TRX domain (OE-SGPS) have been mutated to serines (Toivola et al. 2013). In the mutated forms only 2 cysteine residues are available for alkylation by MAL-PEG molecules. The schematic drawings depict possible locations of MAL-PEG binding in specific bands. Leaves were incubated in darkness (D), or illuminated for 2 h in low light (LL,  $40 \mu\text{mol photons m}^{-2} \text{s}^{-1}$ ), growth light (GL,  $200 \mu\text{mol photons m}^{-2} \text{s}^{-1}$ ) or high light (HL,  $800 \mu\text{mol photons m}^{-2} \text{s}^{-1}$ ).

**(B)** Level of NTRC overexpression in OE-NTRC *ndho* and OE-NTRC *pgr5* plants detected by immunoblotting with an NTRC-specific antibody. 10 and 2  $\mu\text{g}$  of soluble protein was loaded for WT and 2  $\mu\text{g}$  for OE-NTRC, OE-NTRC *ndho* and OE-NTRC *pgr5*. Two individual plants were sampled for OE-NTRC *ndho* and OE-NTRC *pgr5*. Coomassie brilliant blue (CBB) staining was used as loading control.

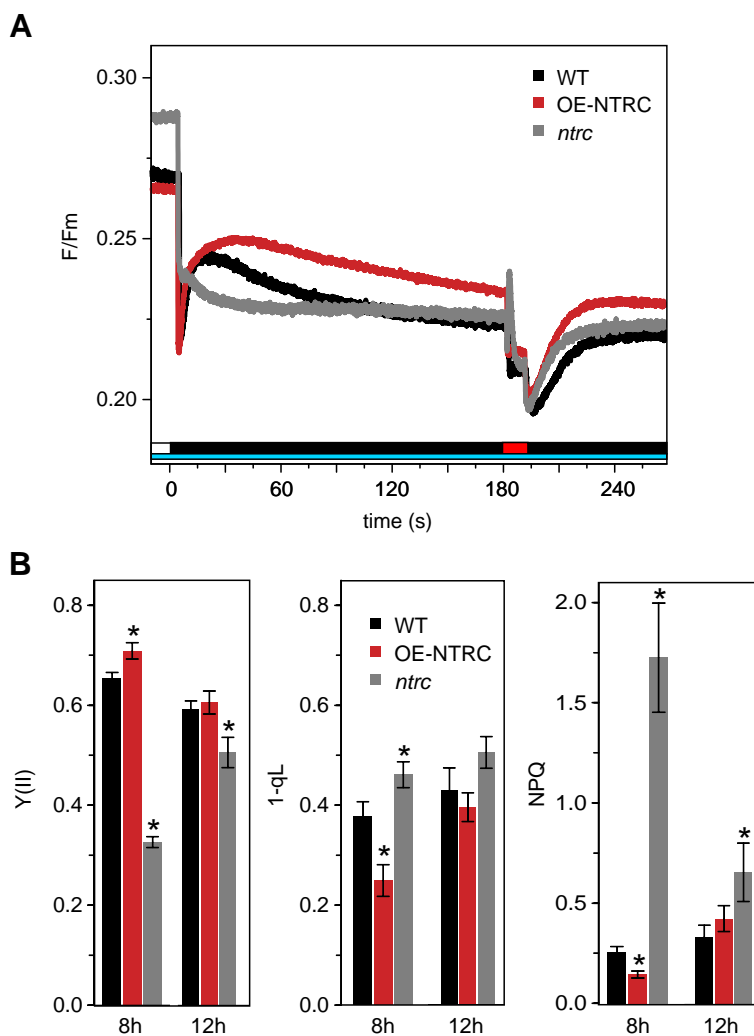

**Supplemental Figure 2.** Post-illumination fluorescence rise (PIFR) in plants grown in a 12h/12h photoperiod.

**(A)** PIFR in dark-adapted WT, OE-NTRC and *ntrc* plants grown in a 12h/12h photoperiod under  $120 \mu\text{mol photons m}^{-2} \text{s}^{-1}$ . The cyan bar indicates exposure to a 480 nm measuring light of  $0.28 \mu\text{mol photons m}^{-2} \text{s}^{-1}$ , the white bar depicts illumination with  $67 \mu\text{mol photons m}^{-2} \text{s}^{-1}$  white light and the red bar shows the duration of a pulse of far red light. The curves are averages of 3–4 individual measurements.

**(B)** Quantum yield of PSII (Y(II)), redox state of the PQ pool (1-qL) and non-photochemical quenching (NPQ) at Fm' (after 7 min illumination) in plants grown either in an 8h or 12h photoperiod. The values are averages of 3–10 measurements  $\pm$ SE, and statistically significant differences to WT according to Student's T-tests ( $P < 0.05$ ) are marked with \*.

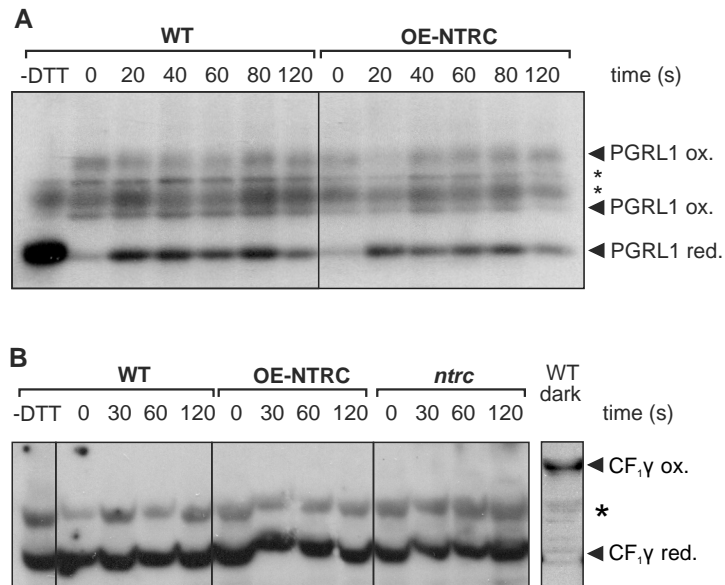

**Supplemental Figure 3.** *In vivo* redox states of PGRL1 and CF<sub>1</sub>γ during changes in light conditions.

**(A)** MAL-PEG assay to determine the *in vivo* redox state of PGRL1 during dark to light transitions. Samples were collected 20, 40, 60, 80 and 120 seconds after moving dark-adapted WT and OE-NTRC leaves under growth light intensity illumination. -DTT is a control sample where free thiols were blocked with NEM but DTT was not added thereafter, preventing any alkylation by MAL-PEG.

**(B)** *In vivo* redox state of the ATP synthase  $\gamma$  subunit (CF<sub>1</sub>γ) during transitions from low light (40  $\mu\text{mol photons m}^{-2} \text{s}^{-1}$ ) to high light (600  $\mu\text{mol photons m}^{-2} \text{s}^{-1}$ ) in WT, OE-NTRC and *ntrc* leaves. Samples were taken 0, 30, 60 and 120 seconds after the shift to high light. Prior to the light intensity shift plants grown under 200  $\mu\text{mol photons l m}^{-2} \text{s}^{-1}$  were kept 30 min under low irradiance. A dark-incubated control (WT dark) is seen in the right panel. \* marks unspecific bands.

**Supplemental Table 1.** Parameters determined from OJIP transients of chlorophyll a fluorescence.

Apparent  $F_0$  values ( $F/F_m$  after 20  $\mu$ s of light), integrated area above O-J phase (0-3 ms) ( $A_{O-J}$ ) and the initial slopes of the O-J transients ( $m_{50-150 \mu s}$ ) in dark-adapted leaves of WT, OE-NTRC, *ntrc*, *pgr5* and *ndho* were calculated from the averaged curves in Figure 3.

| line        | $F_0$ ( $F_{20\mu s}$ ) | $A_{O-J}$ | $m_{50-150 \mu s}$ |
|-------------|-------------------------|-----------|--------------------|
| WT          | 0.18                    | 1.62      | 0.58               |
| OE-NTRC     | 0.21                    | 1.46      | 0.74               |
| <i>ntrc</i> | 0.26                    | 1.29      | 1.20               |
| <i>pgr5</i> | 0.21                    | 1.84      | 0.47               |
| <i>ndho</i> | 0.17                    | 1.76      | 0.57               |

**Supplemental Table 2.** Multiple alignment of NdhS amino acid sequences in embryophytes.

Sequences from *Physcomitrella patens* (PHYPADRAFT\_188716), *Glycine max* (GLYMA03G01720), *Brachypodium distachion* (BRADI3G21280), *Sorghum bicolor* (Sb07g028880), *Oryza sativa* (OS07G0196200), *Solanum lycopersicum* (Solyc08g082400.1), *Arabidopsis thaliana* (AT4G23890) and *Vitis vinifera* (VIT\_02s0025g01470). Conserved cysteine residues are in bold and highlighted with red rectangles. \* signifies full conservation of a residue in the current dataset, while “:” and “.” signify conservation of residues with strongly and weakly similar properties, respectively.

```

Physcomitrella MA--AMTGCICRAPLSLALQRESSFWGSNVGVHQQKSASSNSGGSTGGVRVGIARAEGFDF
Glycine -----MSSFVALQGLHGSLLSSQFLGQDTLTHFHPRNKASSTIQ-NKPTTAQQPSAKFDM
Brachypodium -----MAPAPTTPSFRLRPPPLPHHR-----V-R--LPPPPPSASFRL
Sorghum -----MAPPTSSSFLRPPPLPHHP-----H-PRLH-FRPPSASFRL
Oryza -----MAPTTPASFRLRPPPLPHHH-----H-PRIVRLPPPSATFRV
Solanum MASASSFQLSSLQIQTPPLKSNFLGQSVNLNLS-SSVHTKSAM-KSSSNSVTPIAKFNL
Arabidopsis ---MATSSITIPTIRTP-IHRSKFLGQTHQFSTVNRSVFPPPKQ-QSKLYQVKAMGKFNL
Vitis -----MAYSFTVPSLQRLPLPHKSHFLGQGHFPNNIQKASLSR-----TRTPLPVKASAKFDL
                                         *                                     *

```

```

Physcomitrella WQVLGGRGLKGGEDGLKQEKARVLQEAKKNLVVE-KKKKGSVEGNVEAAEGLPGTFNKE
Glycine LQIVGGRGLCNGEAGLKQELKKQVGVDEKQTSAT-SGKEQEIEEEESTSVVATEDGFEKE
Brachypodium AEILGGRGLCNGEAGLIRKELSSPTTPTPTADSS-P---GGAAAEADPPAVDPDAFEKE
Sorghum SEILGGRGLCNGEAGLIRKELTSGSSAST---TTSS-PAPSPSPSTESPPAVDLDADFKE
Oryza ADLLGGRGLCNGEAGLIRKELASDSPAAPPSTTTSS-DEPAESPPPPPAASGVDPDAFDEKE
Solanum YEILGGRGLCNGEAGLIEKELKKSISEEQKAVGSAAAAASDDDNQENKETGEIPEDGFEKE
Arabidopsis WEVMGGRGLCNGEAGLIEKELQRNIEDEQETSKAEN-NETERESDDSNLSFKVPEDGFEKE
Vitis FGIMGGRGLCNGEAGLQQLKRNIEPAPSPDSVKD-E----EKPALAAVDDVPEDGFDEKE
          : : * * * * * . * * * * : : * * * * *

```

```

Physcomitrella LGGWTGGFPGEKGLRQFVQSNPPPAKASQMSNEIRKLQDSISRPLKPRAPSPPLLMPGM
Glycine LMGLTGGFPGGEVHSG-----KPSSTKTKSSKN-LKLALSKKPKPELPLLLPGM
Brachypodium MMGLTGGFPGGEVGLKDFVAKNPPPPPKRTQPDGIAGS-AAVVAERPRRPELPLFLPGM
Sorghum MMGLTGGFPGGEVGLKDFVAKNPPPPRSKKSNSQLVAP-QATTLASAPRTPPELPLFLPGM
Oryza MMGLTGGFPGGEVGLKDFVAKNPPPPPKPAHRKGLA-----AAATVERPRAPELPLFLPGM
Solanum MMGFTGGFPGEKGLMKFIEKNPPPPPKKTESMVSF-FNQSLVKKPKPELPLLLPGM
Arabidopsis MMGLTGGFPGGEKGLKTFIEKNPPPPPPPPPAKQGSDA-SAVATDKKPKAPKLPLLLPGM
Vitis LLGLTGGFPGGEKGLKQFLEKNPPPEKT-----SGNI-IENARLRKPKPELPLLLPGM
          : * * * * * * * * * * * * * * * * * * * * * * * * * * * * * *

```

```

Physcomitrella TVKVISPSNPYFEFIGIVQRVTDGKVGVI FEGGNWDKLVSFKLQDLERTSQGPPMSNPKS
Glycine IAIVKNPNPNPFYMYCKIVQRITDG-----PRMKNPKS
Brachypodium IVLVKNPNRNAYHYMYCGIVQRVTDGKVGVL FEGGNWDRLITFGVDELEGREKGPPMVNPKS
Sorghum VVLVKNPNNAYYMYCGIVQRVTDGKVAVLFEGGIWDRDLITFDLDELEGREKGPPMVNPKS
Oryza VVLVKNPNNAYHYMYCGIVQRVTDGKVGVL FEGGIWDRDLITFDLDELEGREKGPPMVNPKS
Solanum IAIVKNSNPNPYMYCGIVQRITDGKAAVLFEGGNWDRLISFRLEELERREKGPPMVNPKS
Arabidopsis IAIVKNQNSPYHYMYCGIVQRITDGKAGVLFEGGNWDRLITFRLEELERREKGPPGKNPKS
Vitis IAIVKNPNPNPFYMYCGIVQRITDGKAGVLFEGGNWDRLITFRLEELQRDRKGPMPKNPKS
          . * . . : : * * * * * * * * * * * * * * * * * *

```

```

Physcomitrella AILERMIVPEGTSSPEGASS-----
Glycine AVLKPFLEKKS-----
Brachypodium VVLEALVADLADDTEAEE-----TEKKEEEEAGAAAAKA
Sorghum VVLEDIVAQLEDDDDDDKE-DEAAKKEKEPEGAAAAA-
Oryza VLLES�AAEMEDDVAKKEEKEEAKKKKEEETAAAAA-
Solanum VILEKMVEKSSEA-----
Arabidopsis CILEPLIEQMKEEAAP-----
Vitis AILETLLEQEA-----

```





**Supplemental Table 4.** Multiple alignment of Ndh48 (PNSB1) amino acid sequences in embryophytes.

Sequences from *Physcomitrella patens* (PHYPADRAFT\_106212), *Oryza sativa* (Os08g0276100), *Brachypodium distachion* (BRADI\_3g19630), *Populus trichocarpa* (POPTR\_0001s03600g), *Arabidopsis thaliana* (AT1G15980) and *Glycine max* (GLYMA\_08G218800) were obtained and aligned as described in the legend for Supplemental table 2.

|                           |                                                                                   |
|---------------------------|-----------------------------------------------------------------------------------|
| <i>Physcomitrella</i>     | MSAMAAQVVL-----GAGLANCPQCSICVTRATSSLSHSNPSKQLQRAFGTRTNVRLENA                      |
| <i>Oryza</i>              | MQTPTMSTSMATPAKLP---SPPS--LPIARQ-----CCCHL----LQLGRRG--G                          |
| <i>Brachypodium</i>       | MQTPTMYTSMAARATSA--AANLP--APPPRQ-----CYHYL----LPPAGRR--S                          |
| <i>Populus</i>            | ---MASTSLLPKTIISPFLLTNPPP--LPSHFHTSKPSFFNPSADHH----LPCTRKP---                     |
| <b><i>Arabidopsis</i></b> | <b>---MASSLPLLPKPIISPFKTPPF--STSKPLV-----FL---NFQ----TRLTSRSSDV</b>               |
| <i>Glycine</i>            | MAATYYLLPTSPKTFSPFLRNPPS--IPSGHHVSLLGSL---DYP----FHCSSRRGNN                       |
|                           | :                                                                                 |
| <i>Physcomitrella</i>     | SS--VVVSAKKGWFDDPFDDYGDDEEDTMGELMSQGPQGAEDPRPARDPDSESGYLDFFPA                     |
| <i>Oryza</i>              | AGVARASAKKKNPWLDPFDDGPDDEFDY-RGAFSGG-KQEEDPRPPEDPANPYGFLRFPA                      |
| <i>Brachypodium</i>       | VWALSASPKKKNPWLDPFDDGPDDEFDY-TGVYSGG-KQEDPRPPEDPANPYGFLRFPM                       |
| <i>Populus</i>            | -SILTPYAKKKNPWLDPFDDGEDLDMEY-GSLFVDG-KQEDTRPVDPNPNPYGFLKFPK                       |
| <b><i>Arabidopsis</i></b> | <b>S---VNLKKNPWLDPFDDGEDPDNEY-GSLFADG-KQEDPRPPDNDPNPYGFLKFPK</b>                  |
| <i>Glycine</i>            | SVEANCNAKKNPWLDPFDDGEDPEMEY-GSLFADG-KQEEDPRPPDNDPNPYGFLKFPK                       |
|                           | * : . : * * * * : : * : * * * * : * . * : * * *                                   |
| <i>Physcomitrella</i>     | GFMPEVASLGILIRNDVRRCCVMSISGGVYENLLFFPVIQLLKNRYPGVRIDVMATPRGKQ                     |
| <i>Oryza</i>              | GYNPELDSLASKVRRDVRRAACVWSGGVYENLVFFPVVQLLRDRYPGVVDVVASARGKQ                       |
| <i>Brachypodium</i>       | GYNPELDSLASKVRGDVRRACVWSGGVYENLVFFPVVQLLDRYPGVLIDVVASARGKQ                        |
| <i>Populus</i>            | GYNVEVAQLGLKIRGDVRRCCVMSISGGVYENLLFFPVIQMLKDRYPGILVDVLASDRGKQ                     |
| <b><i>Arabidopsis</i></b> | <b>GYTVELASLPLKIRGDVRRCCVMSISGGVYENLLFFPTIQLIKDRYPGVQVDILTTERGKQ</b>              |
| <i>Glycine</i>            | GYSVEIASLALKVRGDVRRCCVMSISGGVYENLLFFPAIQMLIKDRYPGVQIDVVASERGKQ                    |
|                           | * : * : . * : * * * * . * : * * * * * : * * * * : * : : : * * * * : * : : : * * * |
| <i>Physcomitrella</i>     | AYEMNKNVRKAWVHPVDDQFLRPVDFTEVTVGKIKGEYYDLLVSTKLAGLGQSIFFWLASV                     |
| <i>Oryza</i>              | VYEMCKNVRADVYDPDDDDWPEPAEYTHQLGVLKNRYDLDLIISTKLAGIGHALFLFMSSA                     |
| <i>Brachypodium</i>       | VYEMCKNVRANVYDPDDDDWPEPAEYTHQLGVLKNRYDMLILSTKLAGTGHALFLFMSSA                      |
| <i>Populus</i>            | CYELNKNVRWANVYDPDG-DPEPAIYTDMIGVLKNRYDLDVLSTKLAGLGHASFMFMSSA                      |
| <b><i>Arabidopsis</i></b> | <b>TYELNKNVRWANVYDPDDHWPEPAEYTDMIGLLKGRYDMLVSTKLAGLGHAAFLFMTTA</b>                |
| <i>Glycine</i>            | TYELNKNVRWANVYDPDDDEFPEPAEYTDMVGVLKNRYDMLVSTKLAGLGHAAFLFMTTA                      |
|                           | ** : * * * * * . : * . . * . : * : * . * * * * : * * * * * : * * * * * : *        |
| <i>Physcomitrella</i>     | RNKVSYTYPDVNAAGAAKFLDIAIKAPQLELAESGFNMYAEMIEELSQMGNVPKTEVPP                       |
| <i>Oryza</i>              | RDKVGYVYPNVNSAGAGLFLTEMFRPPTTNLADSGYNMYQDMLEWIGRPAKGVPEHPVPP                      |
| <i>Brachypodium</i>       | REKVGYYVYPNVNGAGAGLFLTEMFKPPTTNLSDGGYNMYQEMLEWLGKPGKGVPPQPIPP                     |
| <i>Populus</i>            | RDKVSYIYPNVNAAGAGLLLTETFTPDSANLSEGGYHMYHQMLDWLGRPIYNVPRQPVP                       |
| <b><i>Arabidopsis</i></b> | <b>RDRVSYIYPNVNSAGAGLMLSETFTAENTNLSELGYSMYTQMEDWLGKPFVPRQPVP</b>                  |
| <i>Glycine</i>            | RDRVSYIYPNVNAAGAGLLLTETFPDSONLSDGGYNMYHQMDWLKPFREVPRQPVP                          |
|                           | * : * . * * * : * * * * . * : * : * : * * * * : * : * : * * : * : *               |
| <i>Physcomitrella</i>     | LEVIGISKVKAYVEAKYREAGVREGEFLVFHGIIECDSSASMTSGDKDCLLPLSMWAEIA                      |
| <i>Oryza</i>              | LRVSIKKLRAFVEDKYSRAGVEKGFVVVHGIASDSFANMRSRGDDCCLLPLEHWAEIA                        |
| <i>Brachypodium</i>       | LRVSIKKLRGIVEDKYSRAGVEKGFVVVHGIASDSVANMTRSGDDCCLLPLEQWAEIA                        |
| <i>Populus</i>            | LRVLSRKLKQYVEAKYRAGAEKGYIVIHGIESDSKASMQSRGDTDSLPLEVWDQIA                          |
| <b><i>Arabidopsis</i></b> | <b>LRVSIKRKVEVAAKYRNAGAVTGKFIIVIHGIESDSKASMQSGDADSLLSLEKWAKII</b>                 |
| <i>Glycine</i>            | LRVSIKKLKEVVEAKYKAGAKKGYVVIHGIKSDSKASMQSRGDPDSLPLEVWAEIA                          |
|                           | * . * . : * : * * * * . * : * * * * . * * * * * : * * * * : * : *                 |





**Supplemental Table 5.** Multiple alignment of NdhJ Amino acid sequences in photosynthetic organisms.

Sequences from *Arabidopsis thaliana* (ATCG00420), *Glycine max* (NDHJ\_SOYBN), *Populus trichocarpa* (NDHJ\_POPTR), *Oryza sativa Japonica* (NDHJ\_ORYSJ), *Brachypodium distachion* (NDHJ\_BRADI), *Physcomitrella patens* (NDHJ\_PHYPA), *Selaginella moellendorffii* (C7B2F7\_SELML) and *Synechocystis PCC 6803* (NDHJ\_SYNY3). Sequences were obtained and aligned as explained in the legend of Suppl. Table 2.

```

Synechocystis -----MGPVSTWLT'TNGFEHQSLTADHLGVEMVQVEADLLLPLCTALYAYG
Selaginella  TLDISATSASDGKVGQLPARPAEHESAHRLPLGFDHQGIETPQIQSEDRPSIAVALYVYG
Physcomitrella -----MQGRLSVWLANHKLPHRPLGFDYQGV EILQIRSEDWLSIAVALYVYG
Oryza        -----MQQGWL SNWLVKHEVVHRSLGFDHRGIETLQIKAEDWDSIAVILYVYG
Brachypodium -----MQQGWL SNWLVKHKVVHRSLGFDHRGIETLQIKAGDWD SIAVILYVYG
Arabidopsis -----MQGTL SVWLAKRGLVHRSLGFDYQGIETLQIKPEDWHSIAVILYVYG
Glycine      -----MQGRLSSWLVKHLIHRSLGFDYQGIETLQIKPEDWHSIAVILYVYG
Populus      -----MRGPLSAWLVKHLVHRSLGFDYQGIETLQIKPEDWHSIAVILYVYG
                * : . . * : * : * : * : . : . . * : * :
    
```

```

Synechocystis FNYLQCQ GAYDEGPGKSLVSFYHLVKLTED--TRNPEEVRLKVF LPRENPVVP SVYWIWK
Selaginella  SNHPRAQCARDVAPGGLLASVYHLAKVQDDEEADQPEELCIKVS SVSKKHPRIP SVFRVRK
Physcomitrella FNYLRSQCAYDVAPGGLLASVYHF TKIEDN-V-DQPEEICIKIFVSRQKPKIP SVFVIWK
Oryza        YNYLRSQCAYDVAPGGLSLASVYHLTRIQYG-I-DNPEEVCIKVFAQKDNPRIP SVFVIWR
Brachypodium YNYLRSQCAYDVAPGGLSLASVYHLTRIQYG-I-DNPEEVCIKVFAQKDNPRIP SVFVIWR
Arabidopsis YNYLRSQCAYDVAPGGLLASVYHLTRIEYG-V-NQAE EVCIKVFTHRSNPRIP SVFVWVK
Glycine      YNYLRSQCAYDVAPGGLLASVYHLTRIEYG-I-DQPEEVCIKIFVARKNPRIP SIFVWVK
Populus      YNYLRSQCAYDVAPGGLLASIYHLTRIEYG-ILDQPEEVCIKVFAPRKNPRIP SVFVWVK
                * : . * * * . * * * . * : * : * : * : . : . : * : * : * : * :
    
```

```

Synechocystis AADWQERECYDMFGIVYEGHPNLKRILMPEDWVGWPLRKDYISPDFYELQDAY-
Selaginella  SADLQERESYDMLGIFHESHPR LKRISMPDTWIGRPLRKDHTVPDFYEPQDSL R
Physcomitrella SADFQERESYDMLGISYENHPRLKRILMPDTWIGWPLRKDYIVPDFYELQDAY-
Oryza        SSDLFQERESFDMVGISYDNHPRLKRILMPESWIGWPLRKDYITPNFY EIQDAH-
Brachypodium SADFQERESYDMVGISYDNHPRLKRILMPESWVGWPLRKDYITPNFY EIQDAH-
Arabidopsis STDFQERESYDMLGITYD SHPR LKRILMPESWIGWPLRKDYIAPNFY EIQDAY-
Glycine      SADFQEKESYDMLGISYDNHPRLRRILMPESWIGWPLRKDYIAPNFY EIQDAH-
Populus      SADFQERESYDMLGISYDNHPRLKRILMPESWIGWPLRKDYIAPNFY EIQDAH-
                : * * : * : * : * : * : * : * : * : * : * : * : * : * :
    
```

**Supplemental Table 6.** Multiple alignment of Ndh45 amino acid sequences embryophytes.

Sequences from *Arabidopsis thaliana* (AT1G64770), *Populus trichocarpa* (B9IPP5\_POPTR), *Glycine max* (A0A0R0FL97\_SOYBN), *Oryza sativa Japonica* (Q10RI6\_ORYSJ), *Brachypodium distachion* (I1H9J0\_BRADI) and *Selaginella moellendorffii* (D8SKY5\_SELML). Sequences were obtained and aligned as explained in the legend of Suppl. Table 2.

```
Selaginella      ME-----I---AGKSAIGLSPLKWERMERAELLQERFGCKELEFERS--D
Arabidopsis      --MASLISFLLPKPKAVR-----SSISAPQTQTINTEKLEDKFGRKGIFSES--N
Oryza            MATSSLLPLHLPTRPASVAVKASAA-----ATAAAAPTQSLEESFGRKGLRFAADPAT
Brachypodium     ---MAFLPLHLPASSPTLLTARASSTAVSVSPPAQTSLSLQVLEETFGRKGIRFGAD-AT
Populus          --MASLLSFSLRKPSI-I---KATSLSPT----TTSPSTPEVLEEKFGRKGIFLES--N
Glycine          --MASFLSLSLPKLNL-I---KASSAANTTTTTTTTTLPTAETLNEKFGRKGIFLES--D
                  :                               *:: ** * :.* .
```

```
Selaginella      GIVEARLKLACGSAATIALPQGVVTSYRPIM-WHESQEEVLHSKRFPLQGG-----CAYK
Arabidopsis      NIPMVELKVRNGSSSLKLSLSDAHVLSYKPKVYWKD---EGFEEVLYTVDGD-----ESR
Oryza            GAPTAELSVRNGSSSLQLRLADGLVTSYRPKVYWKD---DGCREVLHTVAGAG--AGGEVK
Brachypodium     GAPTAELSVRNGSSSLRLNDGLVTSYRPKVSWKEDKDGCREILHTVSDS-----KTLK
Populus          NVPTVELKVRNGSSVRVQIPNAYVSSYKPKVYWKD---DGFEEVLYTLPGEKEDSSGIK
Glycine          NTPIVDLTVRNGSSSLRLRIPDAHVTSYKPKVNWKD---DGFQEVLYTIPATETGP-YKAK
                  . . *.: **: : : . * **:* : **:* .. . :
```

```
Selaginella      GGIRASVARIPEVEDGEETKRANPPLSWIVNGVSRAPNKWVKITLGSS--LPNLKLNKNS
Arabidopsis      GGVGVVIVNGEEP----KGGSSVISGCDWSVKDSDAIDALQIELSCT--AGVLDITYI
Oryza            GVGGLALSEVSSS----GAAESLLVGESESVVDADSDSYDAVQVELGCTKSGTLEVTYV
Brachypodium     GVGGLVNLHAS-S----GSPSAAAVQPEWSVSAVSDSDSYDAMQVELGRGMSGPQLEVAIV
Populus          GGIGLVINDASEG----GSKGSLISSSEWTVKDVSDSIDAVQVELSCS--SGPLEISYV
Glycine          GVGGLVMNEVLQP----GAKGLLPSTLEWTVNDVSDSIDALQVELSCT--SRFFDITYI
                  **:* : . * * .. . ::: * . :::
```

```
Selaginella      VTLSKRQLQSTLSIENTGKAPCCFHASIATAVEVGDLAGAYAMGLLGTNFLSLGDESIAE
Arabidopsis      VSLYPVSMTALVVKNNGRKPVTLKPGIMSYLRFKKRSGAGIQGLKGCYCPNPLSSP-
Oryza            VTLYPLSMATAVMVKNNGKKPVSLTSAMLSHIKFDKRRGTAVEGLRGCYPCSHPPPAAG-
Brachypodium     VTLYATSMATAVIVKNAGKKPVALTGAVLSHIKFDKRRGTAVEGLMGCYCAHPPPPASG-
Populus          VSLYPLSMASAVIVKNNGRKDVTLTSAILSHLKFKKRAKAGIQGLRGCYCYCTQPPPLSSP-
Glycine          VTLYPVSMTAVVAKNIGPKPATLTNAILSHFRFKNRRGTAIKGLRSCYIIPHAPLSSP-
                  **.* : ::: :* * : . : : . . . : ** : :
```

```
Selaginella      NTTAGEEQGPRIFEKLAVALLSGGSYKRPERESQOGDESFGKDGRLWHRHCSEMAPLAPG
Arabidopsis      -----FELLSPSEAMKAESSGWFGESE---EGEKPGIWAVEDSVITLLEKK
Oryza            -----FALLTPAEAMKREDGGWFGGG-GGEEPRQGVVTVEDNLYTILKKK
Brachypodium     -----FALLTPAEAMKREESGWFGGGGGEEPRPGEWAVEENRYTILKKK
Populus          -----FEVLSPSEALKPESPLLDLDFD-FEPEEKPGSWKVQEEPIIILKDR
Glycine          -----FQILTPSEATISEPPRWLSFG-NETEAKPGTWGQQALSITLLENK
                  : :* . : * . *
```

```
Selaginella      MNRLY-----FMSSMPWTLDDRVRKASLVHLPEIGTEVSEPLQSG-ARVAGGR
Arabidopsis      MSRIYGAPPAERLKAVYNTPPSKFETIDQKKKVLDAKN-----KIKIPKGISNSFRE
Oryza            VSRVYAAPPEERKKRIYSTAPSKFTTIDQNSGLGFR-VVRMGYEDMYLCSPGEMYRKFYK
Brachypodium     VSRVYAAPPEERKKRVYNSAPSNFMTIDQSSGLGFR-VVKMGFEDMYLSSPGGMYDKFGN
Populus          LSRVYAAPPQERLKAFYNTSPTKYETLDQKELFFR-VIRIGFEDIYIGSPGSFAEKYK
Glycine          MSRVAAPPKERLKAFYNTPPSKYETIDQGRGLCFR-VIRMGFEDIYLSPPGSLSEKYK
                  :.*:* : :*: : . .
```

|                    |                                                                    |
|--------------------|--------------------------------------------------------------------|
| Selaginella        | LEKVCAA-----RPNFG-----                                             |
| <b>Arabidopsis</b> | <b>RIVFQDDKDWRRDVCGIPRIDVGQVWEATLLRVHRSNVNARSCRCSLRRDMERSNGNRA</b> |
| Oryza              | DYFLCTGTAS----MLVPVVVNPGE EWRAAQVIEHDNL-----                       |
| Brachypodium       | DYFLCTGPAS----LLVPVVVNPGE EWRAAQVIEHDNL-----                       |
| Populus            | DYFICTGPAA----MLVPVVVKPGE EWKGAQMIEHDNL-----                       |
| Glycine            | DYFICTGPAS----ILVPVTVNPGE EW RGAQVIEHDNLT-----                     |

**Supplemental Table 7.** Forward and reverse primers used for cloning of bimolecular fluorescence complementation (BiFC) constructs.

Restriction enzyme sites are underlined and translational start codon is marked by bold italic. Frw = forward primer, rev = reverse primer. In order to get proper fusion to C-terminal YFP half, reverse primer lacks a stop codon. RE = restriction enzyme. The cDNA clones were obtained from the Arabidopsis Biological Resource Center (ABRC). All primers were purchased from Sigma Aldrich.

| Construct(s)  | AGI-code    | Primer sequences |                                                             | RE-sites |
|---------------|-------------|------------------|-------------------------------------------------------------|----------|
| pSPYCE.NDH-S  | AT4G23890.1 | Frw              | 5'- CTGCAGAGGATCC <b><i>ATGG</i></b> CGACTTCTTCGATCAC -3'   | BamHI    |
|               |             | Rev              | 5'- CTGCAGACCCGGGTGGTGCCTCTTCCTTTT -3'                      | XmaI     |
| pSPYNE.NDH-S  | AT4G23890.1 | Frw              | 5'- CTGCAGAGGATCC <b><i>ATGG</i></b> CGACTTCTTCGATCAC -3'   | BamHI    |
|               |             | Rev              | 5'- CTGCAGACCCGGGTGGTGCCTCTTCCTTTT -3'                      | XmaI     |
| pSPYCE.PGR5   | At2g05620.1 | Frw              | 5'- CTGCAGAGGATCC <b><i>ATGG</i></b> GCTGCTGCTTCGATTTT -3'  | BamHI    |
|               |             | Rev              | 5'- CTGCAGACCCGGGAGCAAGGAAACCAAGCCTCT -3'                   | XmaI     |
| pSPYNE.PGR5   | At2g05620.1 | Frw              | 5'- CTGCAGAGGATCC <b><i>ATGG</i></b> GCTGCTGCTTCGATTTT -3'  | BamHI    |
|               |             | Rev              | 5'- CTGCAGACCCGGGAGCAAGGAAACCAAGCCTCT -3'                   | XmaI     |
| pSPYCE.PGRL1A | At4g22890   | Frw              | 5'- CTGCAGAGGATCC <b><i>ATGG</i></b> GTAGCAAGATGTTGTTTA -3' | BamHI    |
|               |             | Rev              | 5'- CTGCAGACCCGGGAGCTTGGCTTCCTTCTGGC -3'                    | XmaI     |
| pSPYNE.PGRL1A | At4g22890   | Frw              | 5'- CTGCAGAGGATCC <b><i>ATGG</i></b> GTAGCAAGATGTTGTTTA -3' | BamHI    |
|               |             | Rev              | 5'- CTGCAGACCCGGGAGCTTGGCTTCCTTCTGGC -3'                    | XmaI     |
